# Supplementary material for: Hierarchical chirality transfer of perylene diimide-tethered pillar[5]arenes for configuration and type differentiation of amino acid derivatives
Source: Royal Society of Chemistry journal article supplement (doi:10.1039/d3nj05420a), 2023-12-26
Supplement: d3nj05420a1.pdf [file d3nj05420a1.pdf]

## Supplementary Information

# Hierarchical Chirality Transfer of Perylene Diimide-tethered Pillar[5]arenes for Configuration and Type Differentiation of Amino Acid Derivatives

Ting Zhao, Jigao Yi, Chunhong Liu, Lizhi Fang, Long Chen, Yanlin Shen, Xiaotong Liang,  
Kun Li, Wanhua Wu<sup>[a]</sup> and Cheng Yang\*<sup>[a]</sup>

---

Key Laboratory of Green Chemistry & Technology of Ministry of Education, College of Chemistry Institution, Sichuan University  
Chengdu 610064 (China)  
E-mail: yangchengyc@scu.edu.cn

## Materials and Instruments

L- and D-amino acid alkyl ester hydrochlorides enantiomers (99%) were purchased from Sigma Aldrich. All chemicals and solvents were used as received without further purification.  $^1\text{H}$  NMR spectra were recorded at room temperature on Bruker AMX-400 (operating at 400 MHz for  $^1\text{H}$  NMR) and all chemical shifts are reported in ppm with TMS as the internal standard. UV-vis spectra were obtained on a JASCO V650 spectrometer at room temperature. Fluorescence spectra were taken on Fluoromax-4 spectrofluorometer. Circular dichroism (CD) spectra were recorded on a JASCO J-1500 spectrometer using a quartz cuvette of 1 cm path length.

S1, C8 and amino acid derivatives were synthesized according to the previously reported methods.

1

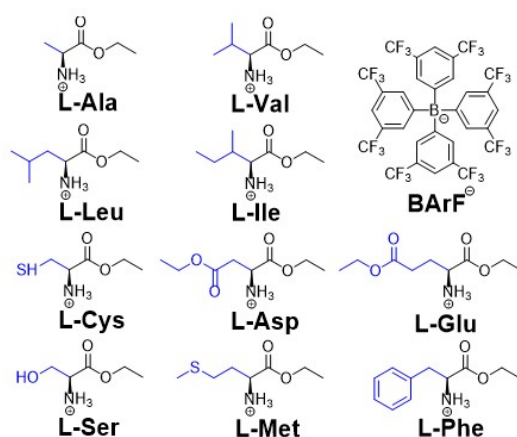

Fig. S1. Chemical structures of amino acid derivatives.

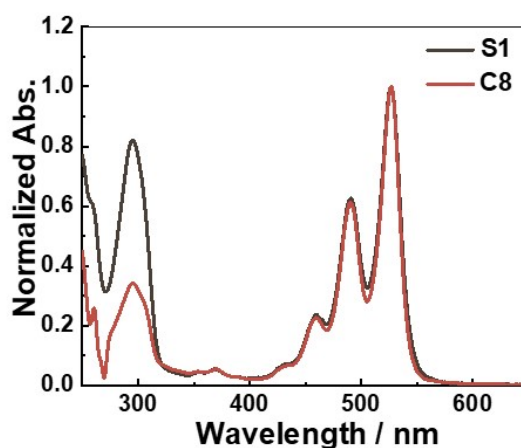

Fig. S2. Normalized UV-Vis absorption spectra of S1 and C8 in  $\text{CHCl}_3$ .

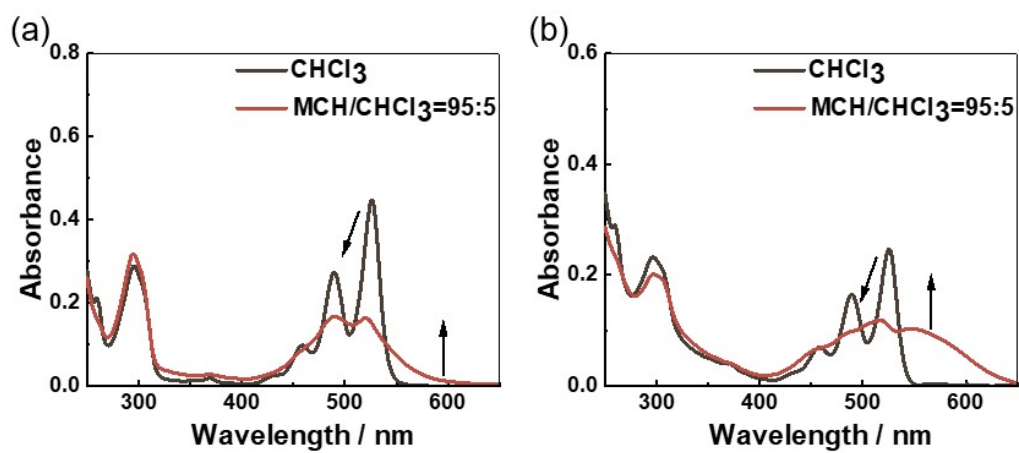

Fig. S3. Solvent-dependent UV-Vis absorption spectra of (a) S1 (0.01 mM), (b) C8 (0.01 mM) from pure  $\text{CHCl}_3$  to 95% MCH.

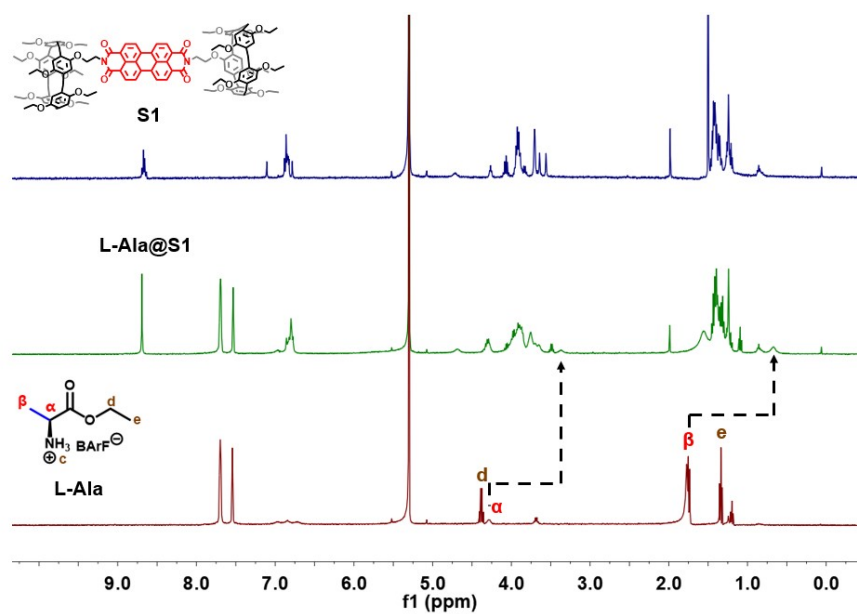

Fig. S4.  $^1\text{H}$  NMR spectra (400 MHz,  $\text{CD}_2\text{Cl}_2$ , 298 K) of S1 (1 mM) (blue), L-Ala@S1 ( $[\text{L-Ala}] = 2 \text{ mM}$ ,  $[\text{L-Ala}]/[\text{S1}] = 2$ ) (green) and L-Ala (1 mM) (red).

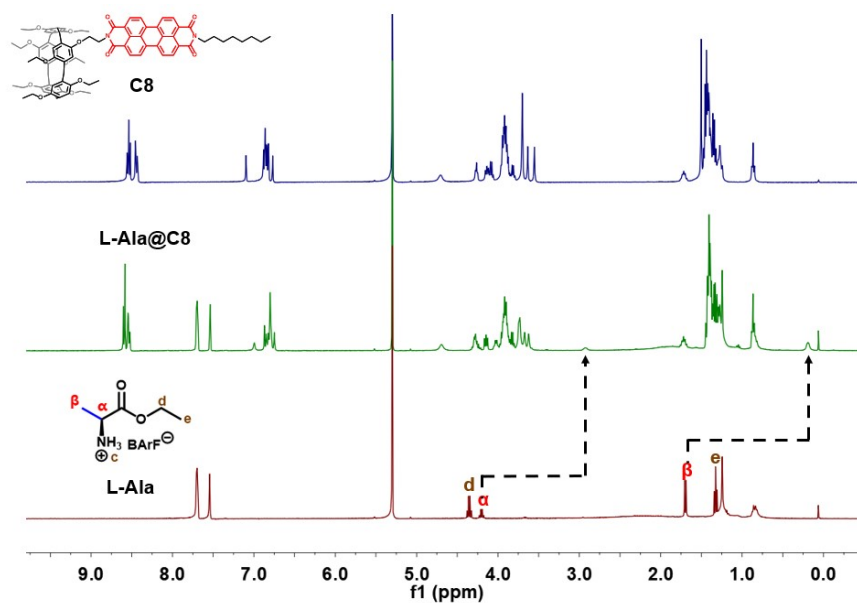

**Fig. S5.**  $^1\text{H}$  NMR spectra (400 MHz,  $\text{CD}_2\text{Cl}_2$ , 298 K) of **C8** (1 mM) (blue), L-Ala@**C8** ([L-Ala] = [C8] = 1 mM) (green) and L-Ala (1 mM) (red).

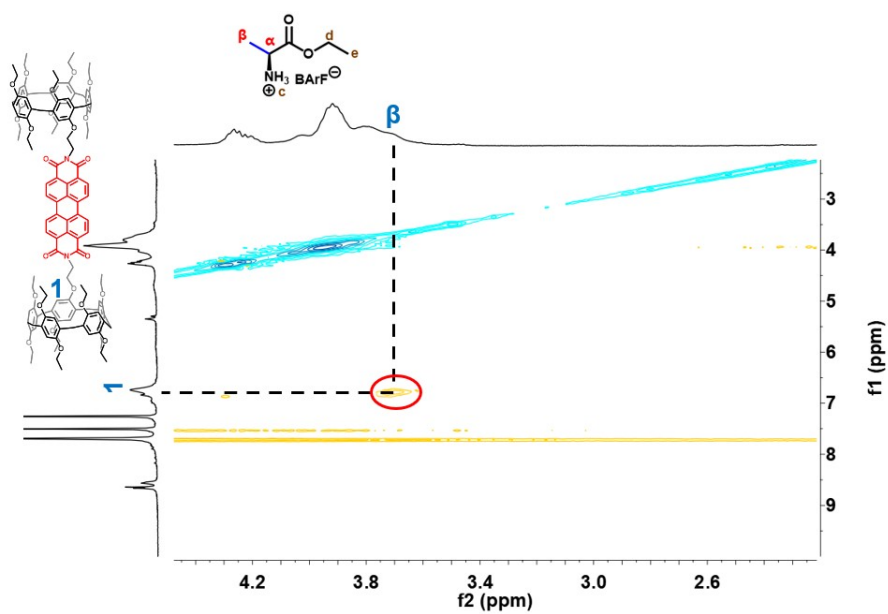

**Fig. S6.**  $^1\text{H}$ - $^1\text{H}$  ROESY NMR (400 MHz,  $\text{CDCl}_3$ , 298 K) spectra of L-Ala@**S1** ([L-Ala] = 2 mM, [L-Ala]/[S1] = 2).

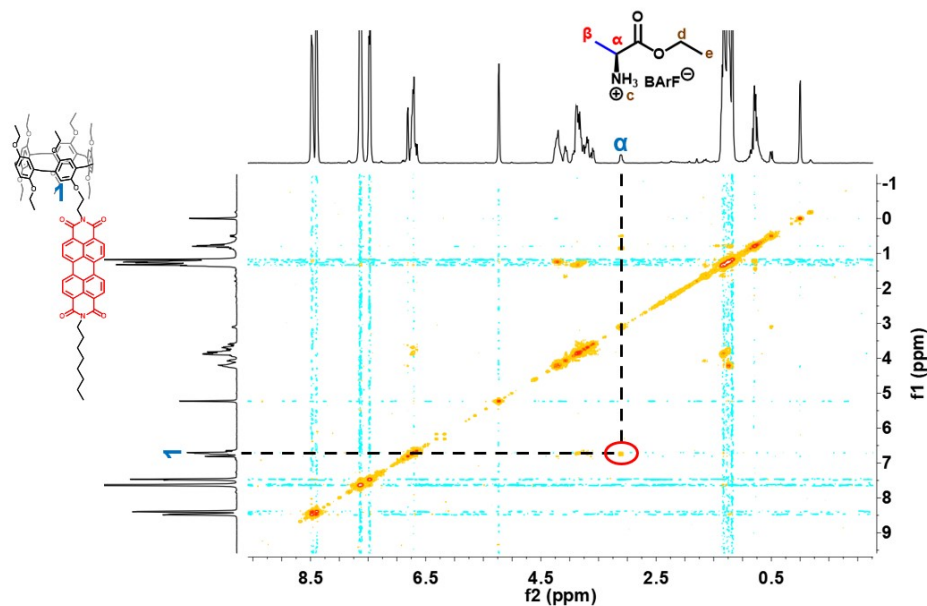

Fig. S7.  $^1\text{H}$ - $^1\text{H}$  ROESY NMR (400 MHz,  $\text{CD}_2\text{Cl}_2$ , 298 K) spectra of L-Ala@C8 ([L-Ala] = [C8] = 1 mM).

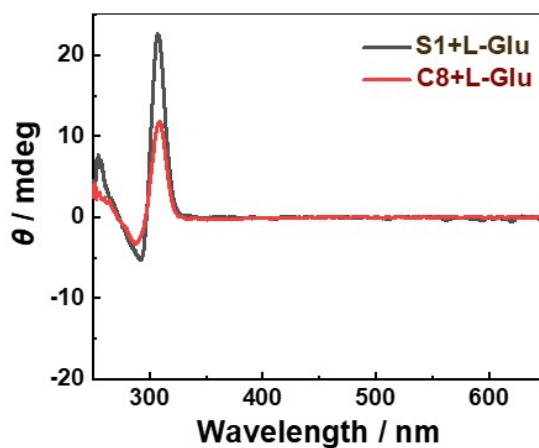

Fig. S8. CD spectra of S1 (0.05 mM) and C8 (0.05 mM) with L-Glu (100  $\mu\text{M}$ ) in  $\text{CHCl}_3$  at 25  $^\circ\text{C}$ .

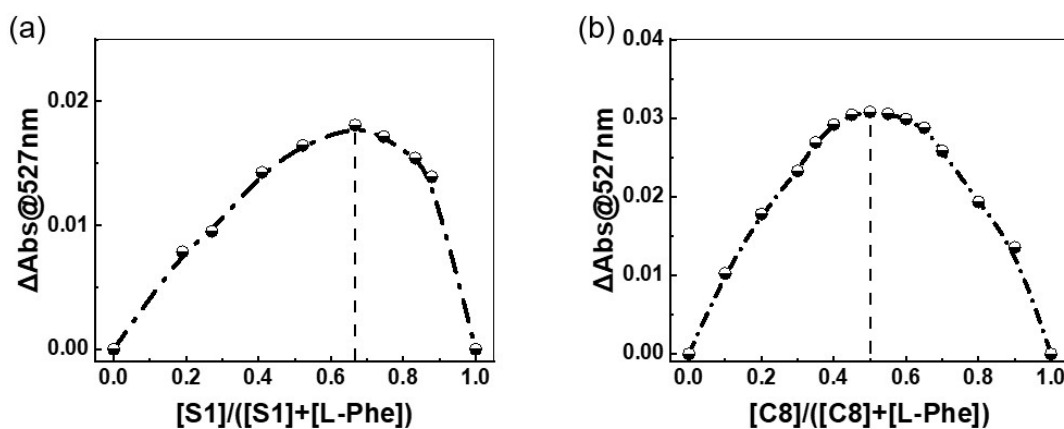

Fig. S9. Job's plot based on the intensity changes at 527 nm in the UV-vis absorption spectra in  $\text{CHCl}_3$  (25  $^\circ\text{C}$ ) for the complexation of L-Phe with (a) S1 and (b) C8.  $[\text{G}] + [\text{H}] = 0.05 \text{ mM}$ .

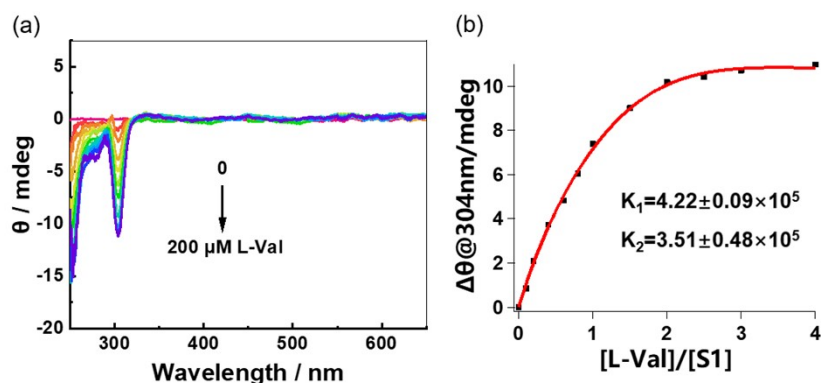

**Fig. S10.** (a) CD spectra of **S1** (0.05 mM) upon titration with L-Val (0-200  $\mu\text{M}$ ) in  $\text{CHCl}_3$  at 25  $^\circ\text{C}$ . (b) The non-linear curve-fitting based on the CD intensity changes at 304 nm, from which the association constants ( $K$ ) for the formation of the 1:2 complexes were estimated to be  $K_1 = 4.22 \pm 0.09 \times 10^5 \text{ M}^{-1}$  and  $K_2 = 3.51 \pm 0.48 \times 10^5 \text{ M}^{-1}$ , respectively.

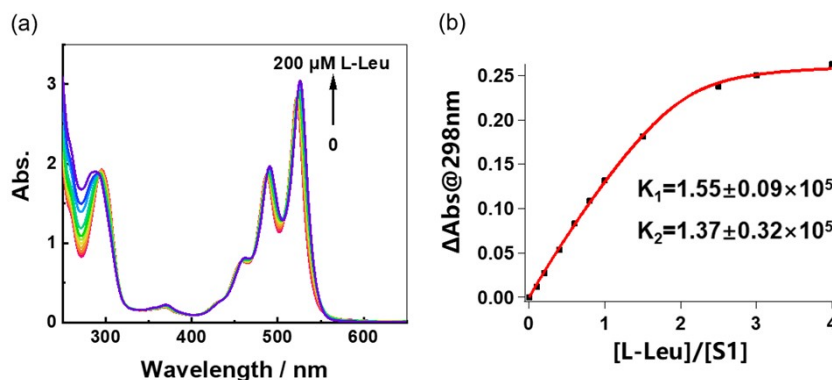

**Fig. S11.** (a) UV-Vis spectra of **S1** (0.05 mM) upon titration with L-Leu (0-200  $\mu\text{M}$ ) in  $\text{CHCl}_3$  at 25  $^\circ\text{C}$ . (b) The non-linear curve-fitting based on the UV-Vis intensity changes at 298 nm, from which the association constants ( $K$ ) for the formation of the 1:2 complexes were estimated to be  $K_1 = 1.55 \pm 0.09 \times 10^5 \text{ M}^{-1}$  and  $K_2 = 1.37 \pm 0.32 \times 10^5 \text{ M}^{-1}$ , respectively.

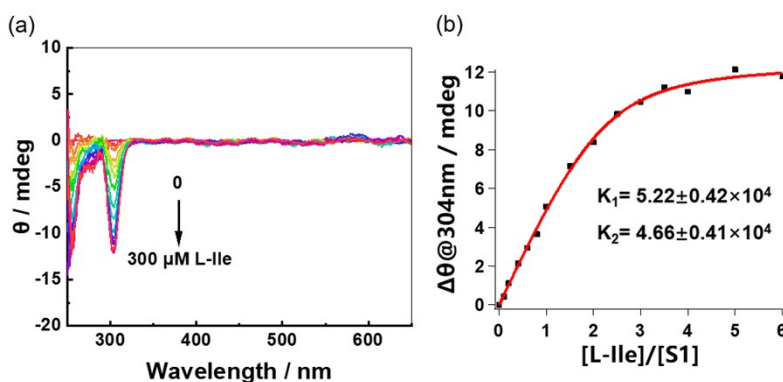

**Fig. S12.** (a) CD spectra of **S1** (0.05 mM) upon titration with L-Ile (0-300  $\mu\text{M}$ ) in  $\text{CHCl}_3$  at 25  $^\circ\text{C}$ . (b) The non-linear curve-fitting based on the CD intensity changes at 304 nm, from which the association constants ( $K$ ) for the formation of the 1:2 complexes were estimated to be  $K_1 = 5.22 \pm 0.42 \times 10^4 \text{ M}^{-1}$  and  $K_2 = 4.66 \pm 0.41 \times 10^4 \text{ M}^{-1}$ ,

respectively.

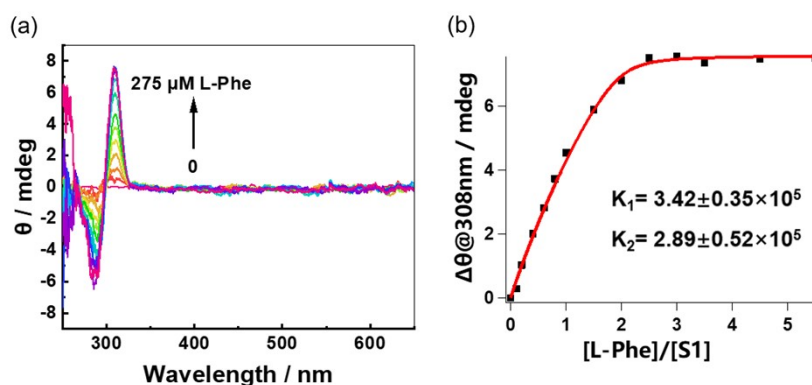

**Fig. S13.** (a) CD spectra of **S1** (0.05 mM) upon titration with L-Phe (0-275  $\mu\text{M}$ ) in  $\text{CHCl}_3$  at 25  $^\circ\text{C}$ . (b) The non-linear curve-fitting based on the CD intensity changes at 308 nm, from which the association constants ( $K$ ) for the formation of the 1:2 complexes were estimated to be  $K_1 = 3.42 \pm 0.35 \times 10^5 \text{ M}^{-1}$  and  $K_2 = 2.89 \pm 0.52 \times 10^5 \text{ M}^{-1}$ , respectively.

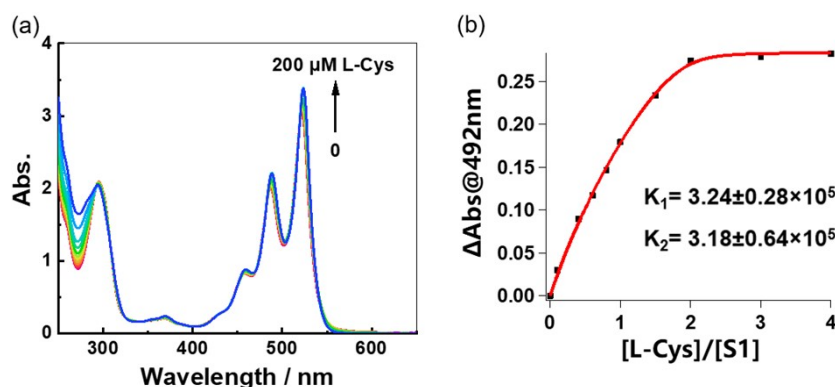

**Fig. S14.** (a) UV-Vis spectra of **S1** (0.05 mM) upon titration with L-Cys (0-200  $\mu\text{M}$ ) in  $\text{CHCl}_3$  at 25  $^\circ\text{C}$ . (b) The non-linear curve-fitting based on the UV-Vis intensity changes at 492 nm, from which the association constants ( $K$ ) for the formation of the 1:2 complexes were estimated to be  $K_1 = 3.24 \pm 0.28 \times 10^5 \text{ M}^{-1}$  and  $K_2 = 3.18 \pm 0.64 \times 10^5 \text{ M}^{-1}$ , respectively.

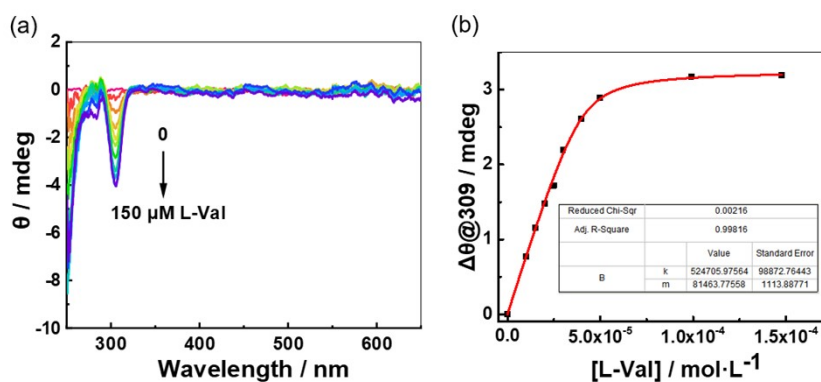

**Fig. S15.** (a) CD spectra of **C8** (0.05 mM) upon titration with L-Val (0-150  $\mu\text{M}$ ) in  $\text{CHCl}_3$  at 25  $^\circ\text{C}$ . (b) The non-linear curve-fitting based on the CD intensity changes at 309 nm, from which the association constants ( $K$ ) for the formation of the 1:1 complexes were estimated to be  $K = 5.25 \pm 0.99 \times 10^5 \text{ M}^{-1}$ .

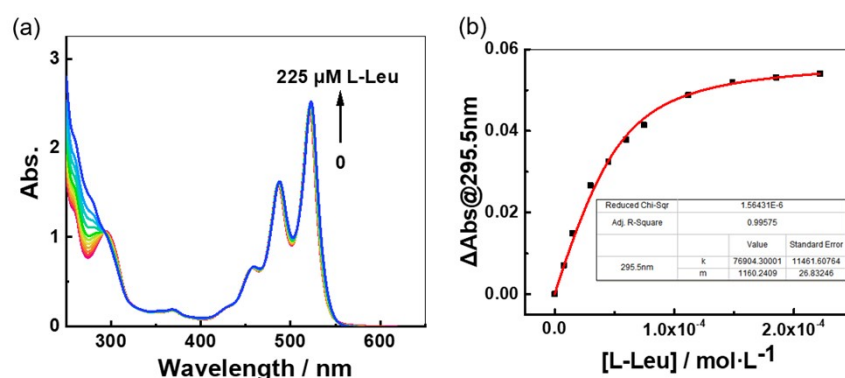

**Fig. S16.** (a) UV-Vis spectra of **C8** (0.05 mM) upon titration with L-Leu (0-225  $\mu\text{M}$ ) in  $\text{CHCl}_3$  at 25  $^\circ\text{C}$ . (b) The non-linear curve-fitting based on the UV-Vis intensity changes at 295.5 nm, from which the association constants ( $K$ ) for the formation of the 1:1 complexes were estimated to be  $K = 7.69 \pm 1.12 \times 10^4 \text{ M}^{-1}$ .

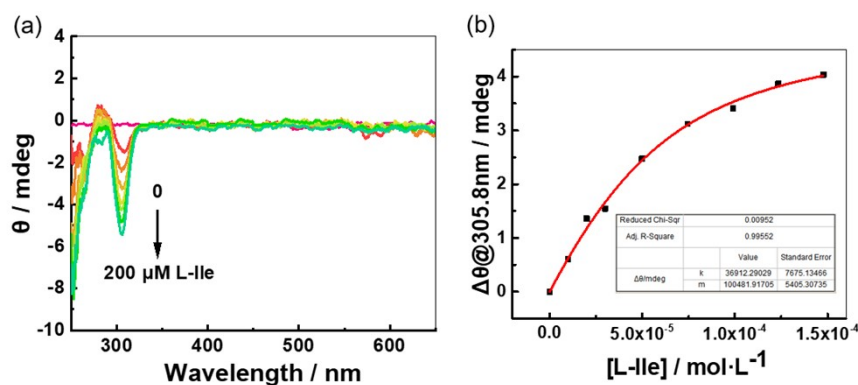

**Fig. S17.** (a) CD spectra of **C8** (0.05 mM) upon titration with L-Ile (0-200  $\mu\text{M}$ ) in  $\text{CHCl}_3$  at 25  $^\circ\text{C}$ . (b) The non-linear curve-fitting based on the CD intensity changes at 305.8 nm, from which the association constants ( $K$ ) for the formation of the 1:1 complexes were estimated to be  $K = 3.69 \pm 0.77 \times 10^4 \text{ M}^{-1}$ .

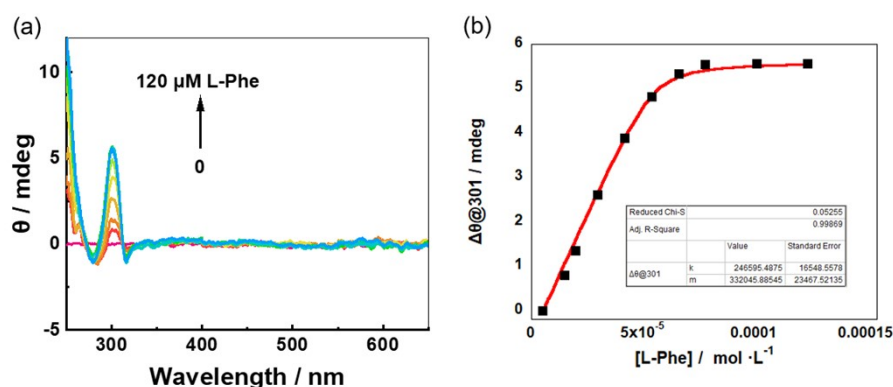

**Fig. S18.** (a) CD spectra of **C8** (0.05 mM) upon titration with L-Phe (0-120  $\mu\text{M}$ ) in  $\text{CHCl}_3$  at 25  $^\circ\text{C}$ . (b) The non-linear curve-fitting based on the CD intensity changes at 301 nm, from which the association constants ( $K$ ) for the formation of the 1:1 complexes were estimated to be  $K = 2.47 \pm 0.16 \times 10^5 \text{ M}^{-1}$ .



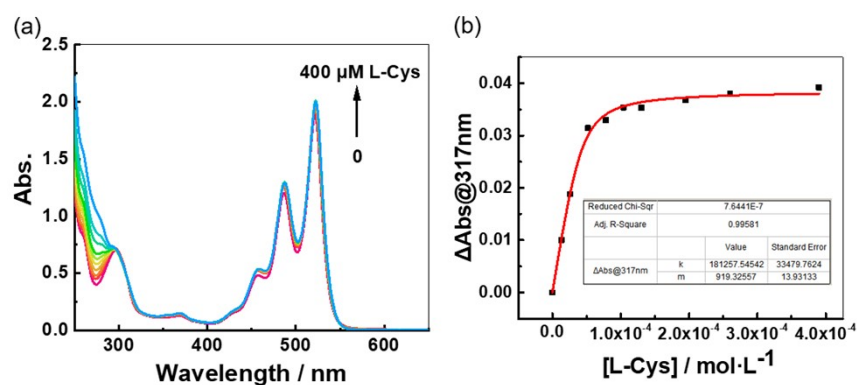

**Fig. S19.** (a) UV-Vis spectra of **C8** (0.05 mM) upon titration with L-Cys (0-400  $\mu\text{M}$ ) in  $\text{CHCl}_3$  at 25  $^\circ\text{C}$ . (b) The non-linear curve-fitting based on the UV-Vis intensity changes at 317 nm, from which the association constants ( $K$ ) for the formation of the 1:1 complexes were estimated to be  $K = 1.81 \pm 0.33 \times 10^5 \text{ M}^{-1}$ .

**Table S1.** Binding constants ( $K$ ,  $\text{M}^{-1}$ ) for **S1** and **C8** with amino acid derivatives.

|                    | <b>S1</b>                   |                             | <b>C8</b>                   |
|--------------------|-----------------------------|-----------------------------|-----------------------------|
|                    | $K_1$ ( $\text{M}^{-1}$ )   | $K_2$ ( $\text{M}^{-1}$ )   | $K$ ( $\text{M}^{-1}$ )     |
| L-Ala <sup>a</sup> | $2.73 \pm 0.33 \times 10^5$ | $2.74 \pm 0.62 \times 10^5$ | $2.07 \pm 0.33 \times 10^5$ |
| L-Val              | $4.22 \pm 0.09 \times 10^5$ | $3.51 \pm 0.48 \times 10^5$ | $5.25 \pm 0.99 \times 10^5$ |
| L-Leu              | $1.55 \pm 0.09 \times 10^5$ | $1.37 \pm 0.32 \times 10^5$ | $7.69 \pm 1.12 \times 10^4$ |
| L-Ile              | $5.22 \pm 0.42 \times 10^4$ | $4.66 \pm 0.41 \times 10^4$ | $3.69 \pm 0.77 \times 10^4$ |
| L-Phe              | $3.42 \pm 0.35 \times 10^5$ | $2.89 \pm 0.52 \times 10^5$ | $2.47 \pm 0.16 \times 10^5$ |
| L-Asp              | $7.57 \pm 0.25 \times 10^4$ | $7.65 \pm 0.37 \times 10^4$ | $8.89 \pm 1.60 \times 10^4$ |
| L-Glu <sup>a</sup> | $7.00 \pm 0.61 \times 10^5$ | $7.01 \pm 1.20 \times 10^5$ | $3.23 \pm 0.28 \times 10^5$ |
| L-Ser <sup>a</sup> | $7.67 \pm 0.11 \times 10^5$ | $7.70 \pm 0.13 \times 10^5$ | $6.41 \pm 0.91 \times 10^5$ |
| L-Met <sup>a</sup> | $9.35 \pm 0.51 \times 10^3$ | $6.06 \pm 0.72 \times 10^3$ | $7.64 \pm 1.06 \times 10^3$ |
| L-Cys              | $3.24 \pm 0.28 \times 10^5$ | $3.18 \pm 0.64 \times 10^5$ | $1.81 \pm 0.33 \times 10^5$ |

The  $K$  ( $K_1$  and  $K_2$  where two values are listed) were obtained from CD or UV-vis spectroscopic titrations with  $[\text{S1}] = [\text{C8}] = 0.05 \text{ mM}$  in  $\text{CHCl}_3$  at 25  $^\circ\text{C}$ . <sup>a</sup>  $K$  value from previous work. <sup>1a</sup>

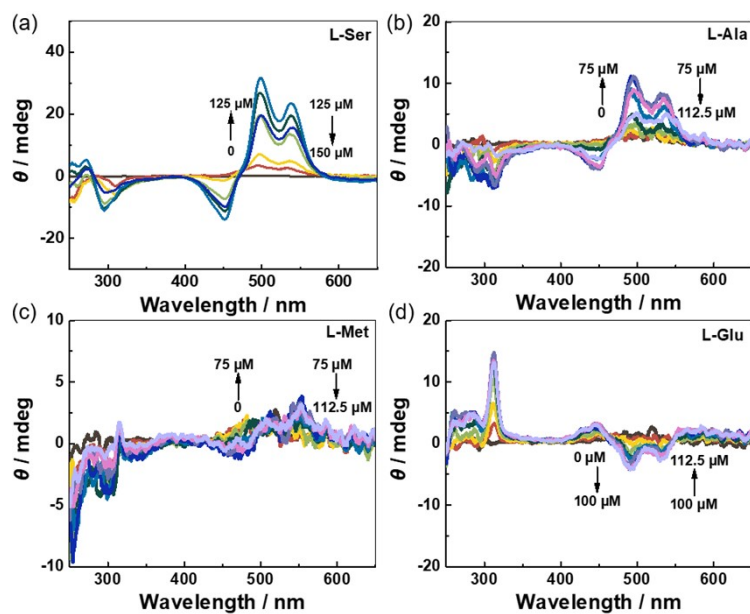

**Fig. S20.** CD spectra of S1 (0.05 mM) upon titration with (a) L-Ser (0-150  $\mu$ M), (b) L-Ala (0-112.5  $\mu$ M), (c) L-Met (0-112.5  $\mu$ M), (d) L-Glu (0-112.5  $\mu$ M) in 95% MCH at 25  $^{\circ}$ C.

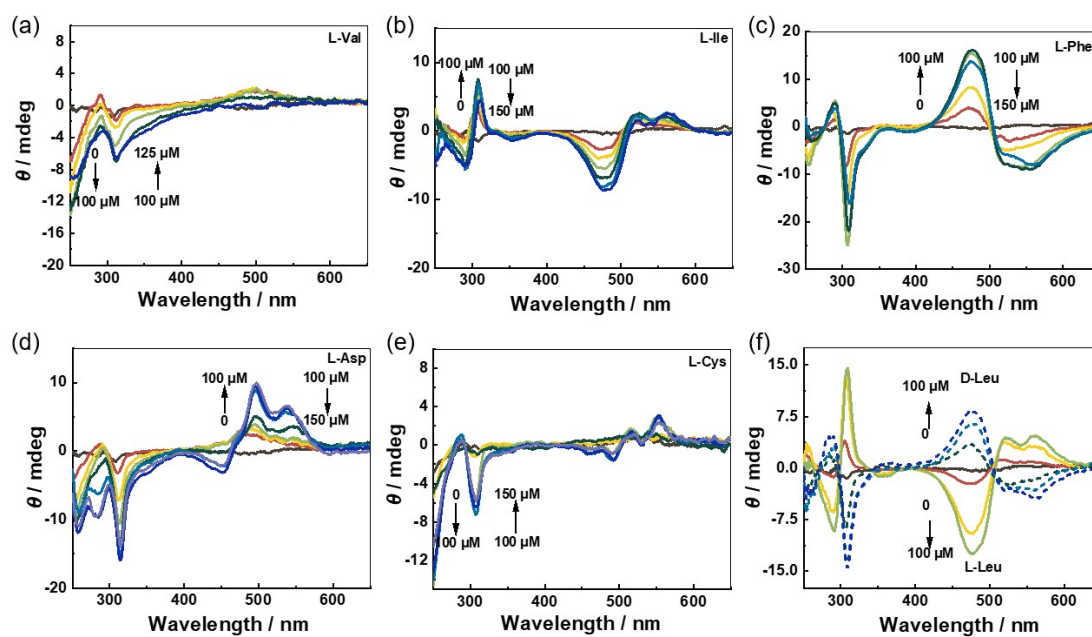

**Fig. S21.** CD spectra of S1 (0.05 mM) upon titration with (a) L-Val (0-125  $\mu$ M), (b) L-Ile (0-150  $\mu$ M), (c) L-Phe (0-150  $\mu$ M), (d) L-Asp (0-150  $\mu$ M), (e) L-Cys (0-150  $\mu$ M), (f) L/D-Leu (0-100  $\mu$ M) in 95% MCH at 25  $^{\circ}$ C.

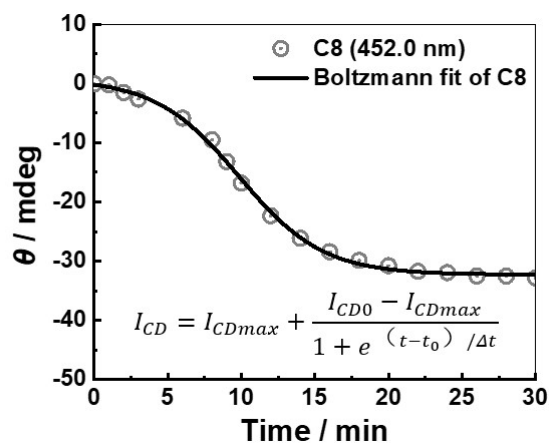

**Fig. S22.** Curve fitting for experimental points (gray circle) based on the Boltzmann equation of the formation kinetics of **Agg-C8** in 95% MCH at 25 °C.  $[C8] = 0.05$  mM.  $I_{CD0}$  represent the CD intensities before aggregation and  $I_{CDmax}$  is the maximum CD intensities that aggregation reaching a stable state,  $t_0$  is the time, in minutes, at which the inflection in CD intensity occurs, and  $\Delta t$  corresponds with the sigmoidal transition period as the CD intensity deviates from  $I_{CD0}$  in the semiloglinear regime, which is the reciprocal of the aggregation rate.

**Table S2.** Kinetic parameters of **Agg-C8** with L-Ser.<sup>a</sup>

|    | $t_0$            | $\Delta t$       | $R^2$  |
|----|------------------|------------------|--------|
| C8 | $9.85 \pm 0.141$ | $2.85 \pm 0.162$ | 0.9985 |

<sup>a</sup> data from Fig. S21.

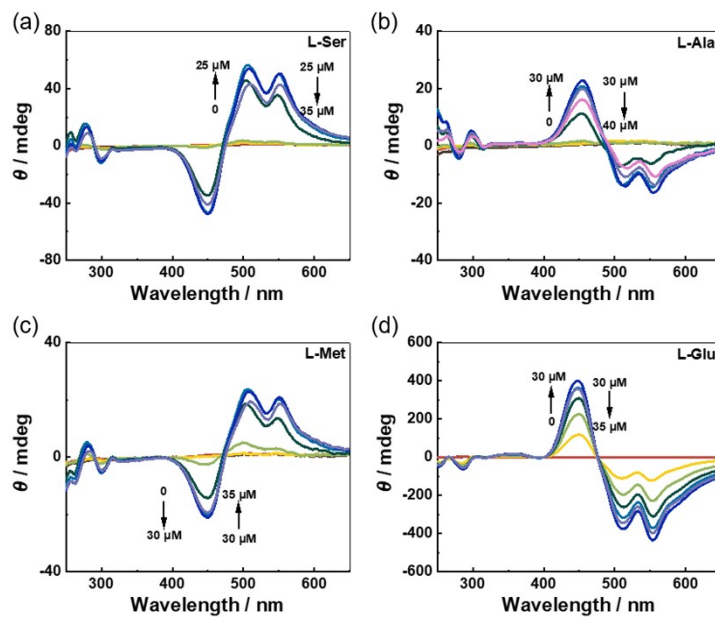

**Fig. S23.** CD spectra of **C8** (0.05 mM) upon titration with (a) L-Ser (0-35  $\mu$ M), (b) L-Ala (0-40  $\mu$ M), (c) L-Met (0-35  $\mu$ M), (d) L-Glu (0-35  $\mu$ M) in 95% MCH at 25 °C.

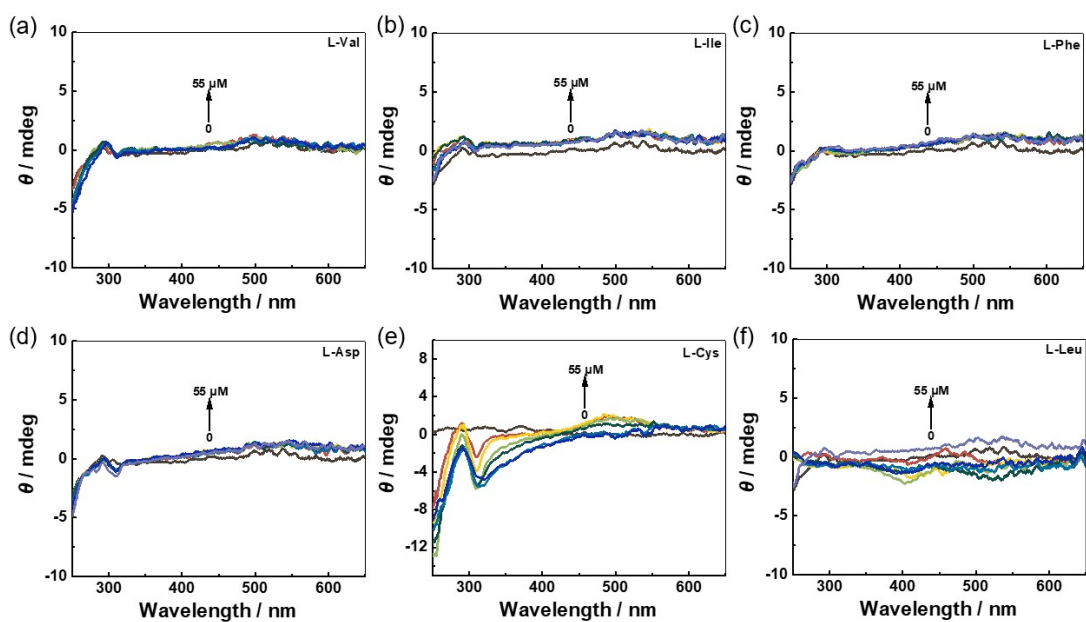

**Fig. S24.** CD spectra of C8 (0.05 mM) upon titration with (a) L-Val (0-55  $\mu$ M), (b) L-Ile (0-55  $\mu$ M), (c) L-Phe (0-55  $\mu$ M), (d) L-Asp (0-55  $\mu$ M), (e) L-Cys (0-55  $\mu$ M), (f) L-Leu (0-55  $\mu$ M) in 95% MCH at 25  $^{\circ}$ C.

- (1) (a) Zhao, T.; Yi, J.; Liu, C.; Liang, X.; Shen, Y.; Wei, L.; Xie, X.; Wu, W.; Yang, C., "First Come, First Served" and Threshold Effects in a Central-to-Planar-to-Helical Hierarchical Chiral Induction. *Angew. Chem. Int. Ed.* **2023**, *62*, e202302232; (b) Ji, J.; Li, Y.; Xiao, C.; Cheng, G.; Luo, K.; Gong, Q.; Zhou, D.; Chruma, J. J.; Wu, W.; Yang, C., Supramolecular enantiomeric and structural differentiation of amino acid derivatives with achiral pillar[5]arene homologs. *Chem. Commun.* **2020**, *56*, 161-164.
